# Supplementary material for: Benzo[a]pyrene and phenanthrene hemoglobin adducts as biomarkers of longer-term air pollution exposure
Source: Royal Society of Chemistry journal article supplement (doi:10.1039/d4em00551a), 2024-11-27
Supplement: d4em00551a1.pdf [file d4em00551a1.pdf]

## Supporting Information

### Benzo[a]pyrene and Phenanthrene Hemoglobin Adducts as Biomarkers of Longer-Term Air Pollution Exposure

Xiangtian Wang,<sup>1#</sup> Yihui Ge,<sup>1#</sup> Yan Lin,<sup>1,2\*</sup> Emily Craig,<sup>1</sup> Ruoxue Chen,<sup>1</sup> Richard K. Miller,<sup>3,4</sup>  
Emily S. Barrett,<sup>3,5,6</sup> Sally W. Thurston,<sup>4,7</sup> Thomas G. O'Connor,<sup>3,8,9,10</sup> David Q. Rich,<sup>4,6,11</sup> and  
Junfeng (Jim) Zhang<sup>1,2\*</sup>

<sup>1</sup> Nicholas School of the Environment, Duke University, Durham, NC, USA

<sup>2</sup> Duke Global Health Institute, Duke University, Durham, NC, USA

<sup>3</sup> Department of Obstetrics and Gynecology, University of Rochester School of Medicine and  
Dentistry, Rochester, NY, USA

<sup>4</sup> Department of Environmental Medicine, University of Rochester School of Medicine and  
Dentistry, Rochester, NY, USA

<sup>5</sup> Department of Biostatistics and Epidemiology, Rutgers University School of Public Health,  
Piscataway, NY, USA

<sup>6</sup> Department of Public Health Sciences, University of Rochester School of Medicine and  
Dentistry, Rochester, NY, USA

<sup>7</sup> Department of Biostatistics and Computational Biology, University of Rochester School of  
Medicine and Dentistry, Rochester, NY, USA

<sup>8</sup> Department of Psychiatry, University of Rochester School of Medicine and Dentistry,  
Rochester, NY, USA

21 <sup>9</sup>. Department of Neuroscience, University of Rochester School of Medicine and Dentistry,  
22 Rochester, NY, USA

23 <sup>10</sup>. Department of Psychology, University of Rochester, Rochester, NY, USA

24 <sup>11</sup>. Department of Medicine, University of Rochester School of Medicine and Dentistry,  
25 Rochester, NY, USA

26 # These authors contribute equally to this work.

27 \* Corresponding Author: Yan Lin, PhD and Junfeng (Jim) Zhang, PhD

28 Yan Lin, PhD

29 Nicholas School of the Environment & Duke Global Health Institute, Duke University, 308

30 Research Drive, LSRC Room A309, Durham, NC 27708

31 Email: [yan.lin@duke.edu](mailto:yan.lin@duke.edu)

32 Junfeng (Jim) Zhang, PhD

33 Nicholas School of the Environment & Duke Global Health Institute, Duke University, 308

34 Research Drive, LSRC Room A309, Durham, NC 27708

35 Phone number: (919) 681-7782

36 Email: [junfeng.zhang@duke.edu](mailto:junfeng.zhang@duke.edu)

37

38

39

### **List of Figure and Table in Support Information**

40

41 Figure S1. Fold difference in PAH-tetrols (PHET and BaPT) levels in association with age,  
42 race/ethnicity, education, household income, pre-pregnancy BMI, smoker, gestational age, and  
43 season of sample collection.

44 Figure S2. Sensitive analysis

45 Figure S3. The Change of PAH-Tetrols Concentration with an IQR Change of Weekly  
46 Cumulative NO<sub>2</sub> Exposure

47 Figure S4. Metabolic Activation of Benzo(a)pyrene: Formation of Diols, Di-Epoxides, and  
48 Tetrols.

49 Table S1-1. HPLC mobile phase gradient program

50 Table S1-2. Parameters used for the HPLC-MS/MS analysis

51 Table S2. Estimated percentage change of PAH-tetrols concentration associated with each  
52 interquartile range (IQR) change in cumulative PM<sub>2.5</sub> weekly concentrations.

53 Table S3. Percentage changes of PAH-tetrols concentrations with one interquartile range (IQR)  
54 increase in proximity to a source traffic variable

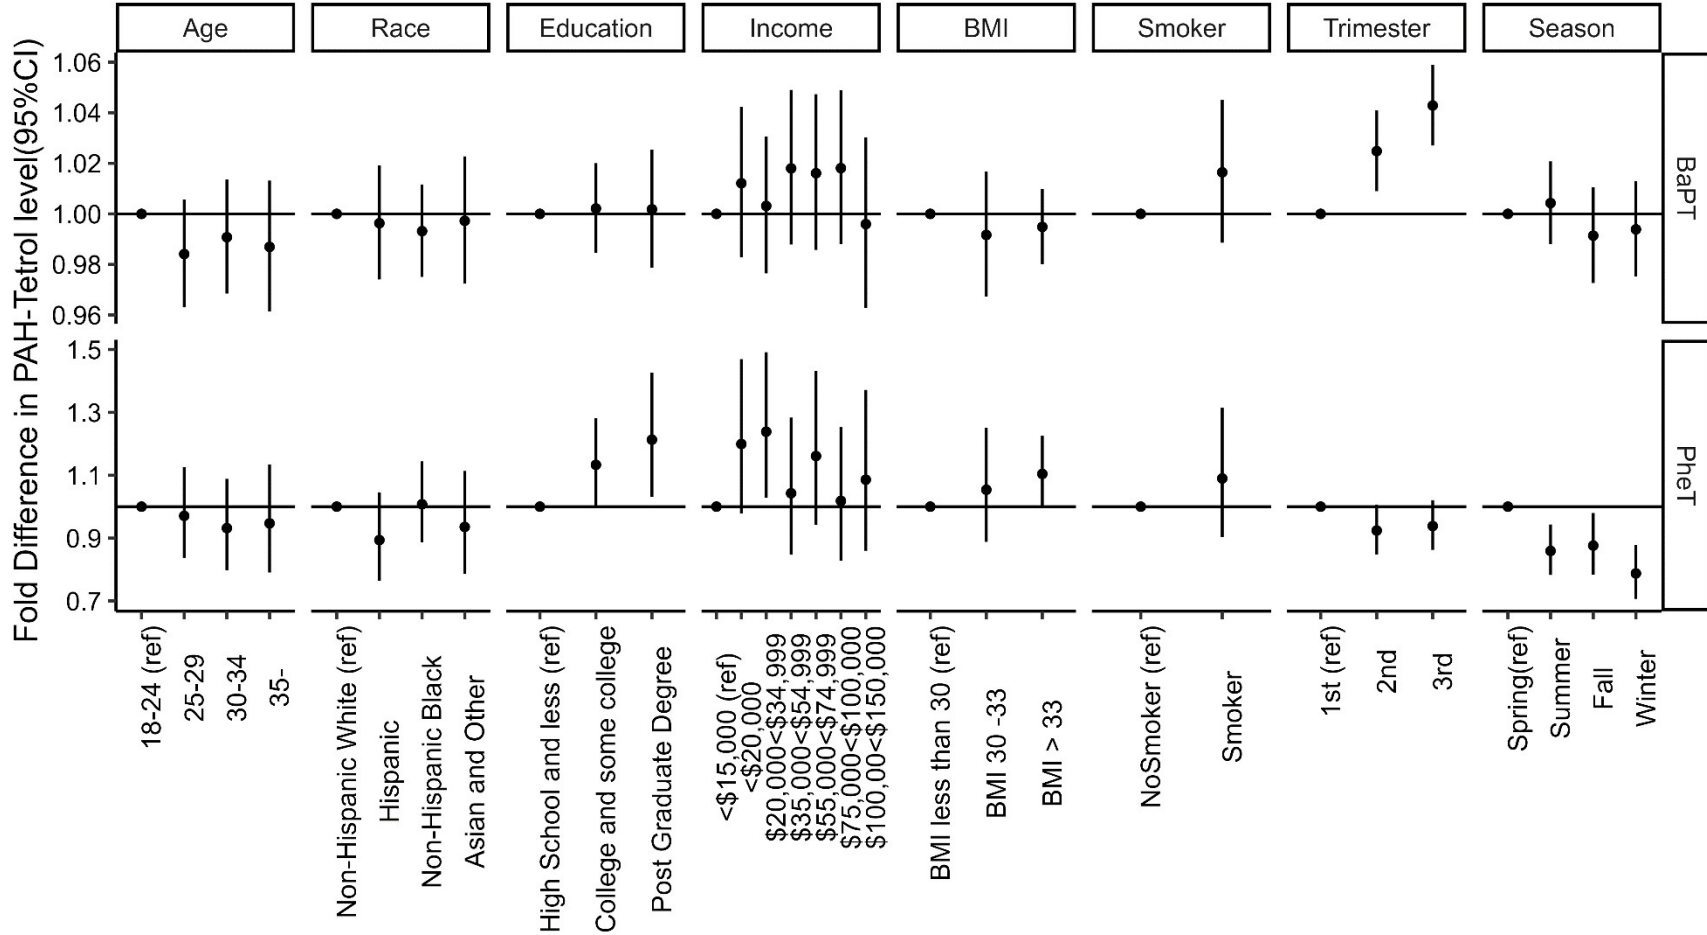

55

56 **Figure S1. Fold difference in PAH-tetrols (PHET and BaPT) levels in association with age, race/ethnicity, education,**  
 57 **household income, pre-pregnancy BMI, smoker, gestational age, and season of sample collection.** Differences were tested by  
 58 linear mixed-effects models with random intercepts of study participants.

59

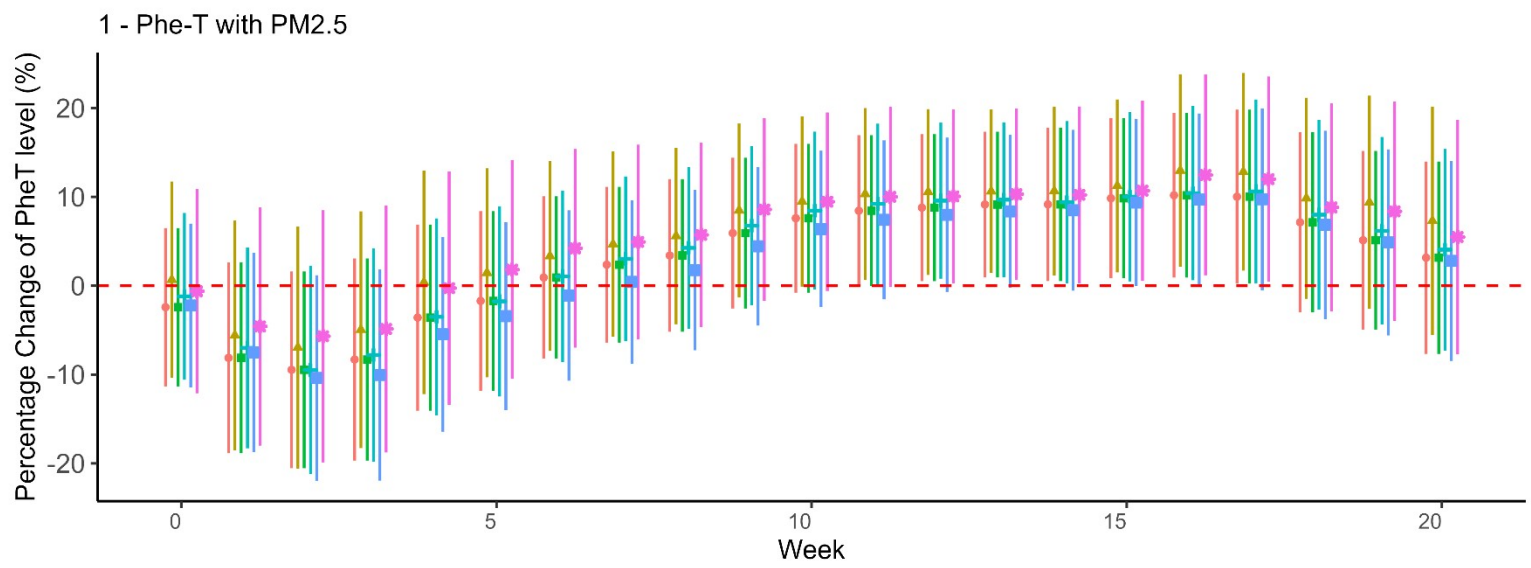

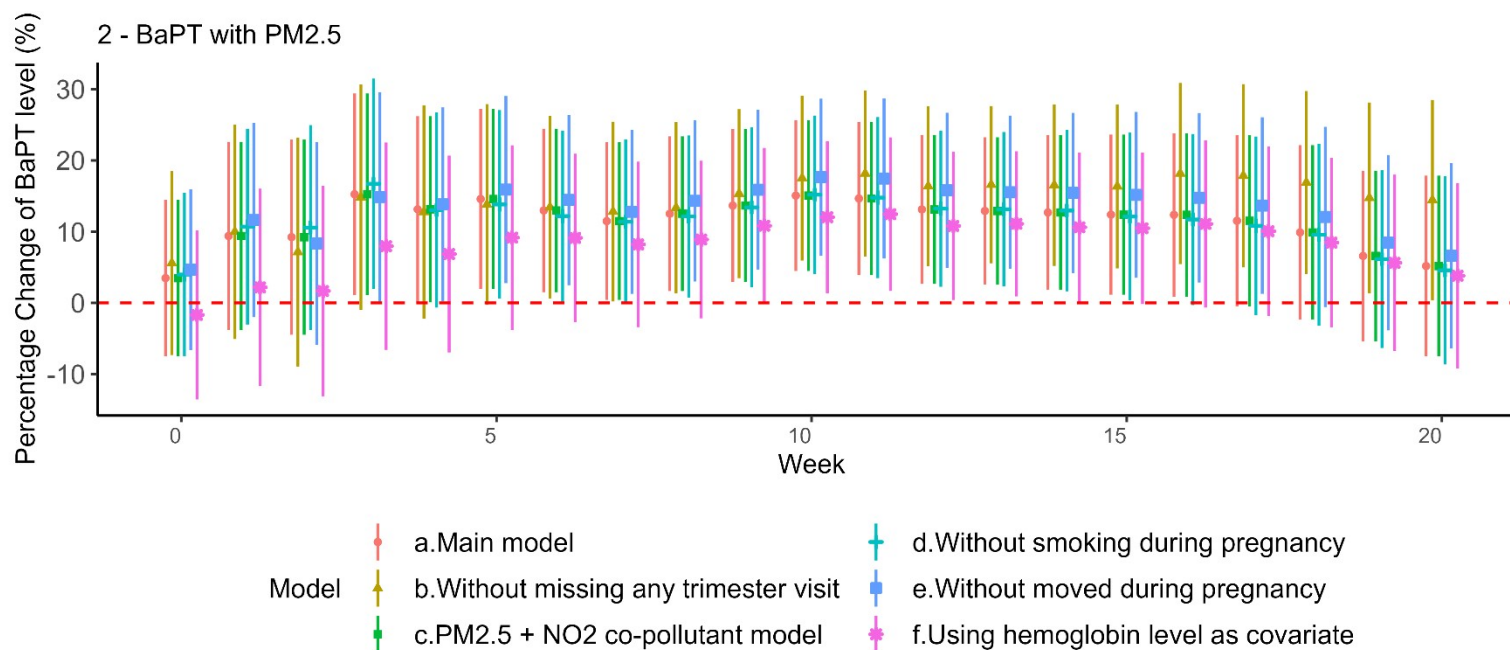

61

62 **Figure S2. Sensitive analysis: Difference of 1-Phenanthrene-Tetrols (PHET) and 2-Benzo(a)Pyrene-Tetrols (BaPT)**

63 **concentrations association with one interquartile increase in Weekly cumulative PM<sub>2.5</sub>:** a. main model, b. excluded participants  
 64 who were missing one or two urine collections, c. included a co-pollutant PM<sub>2.5</sub> + NO<sub>2</sub> as covariates in the model, d. excluded  
 65 participants who were smoking during pregnancy, e. excluded participants who moved to another address during pregnancy, f. using  
 66 hemoglobin level as a covariate instead of normalization. Generated using mixed-effects models with random intercepts of study  
 67 participants and controlling for age, gestation age, pre-pregnancy body mass index (BMI), income groups, education groups, and  
 68 season.

69

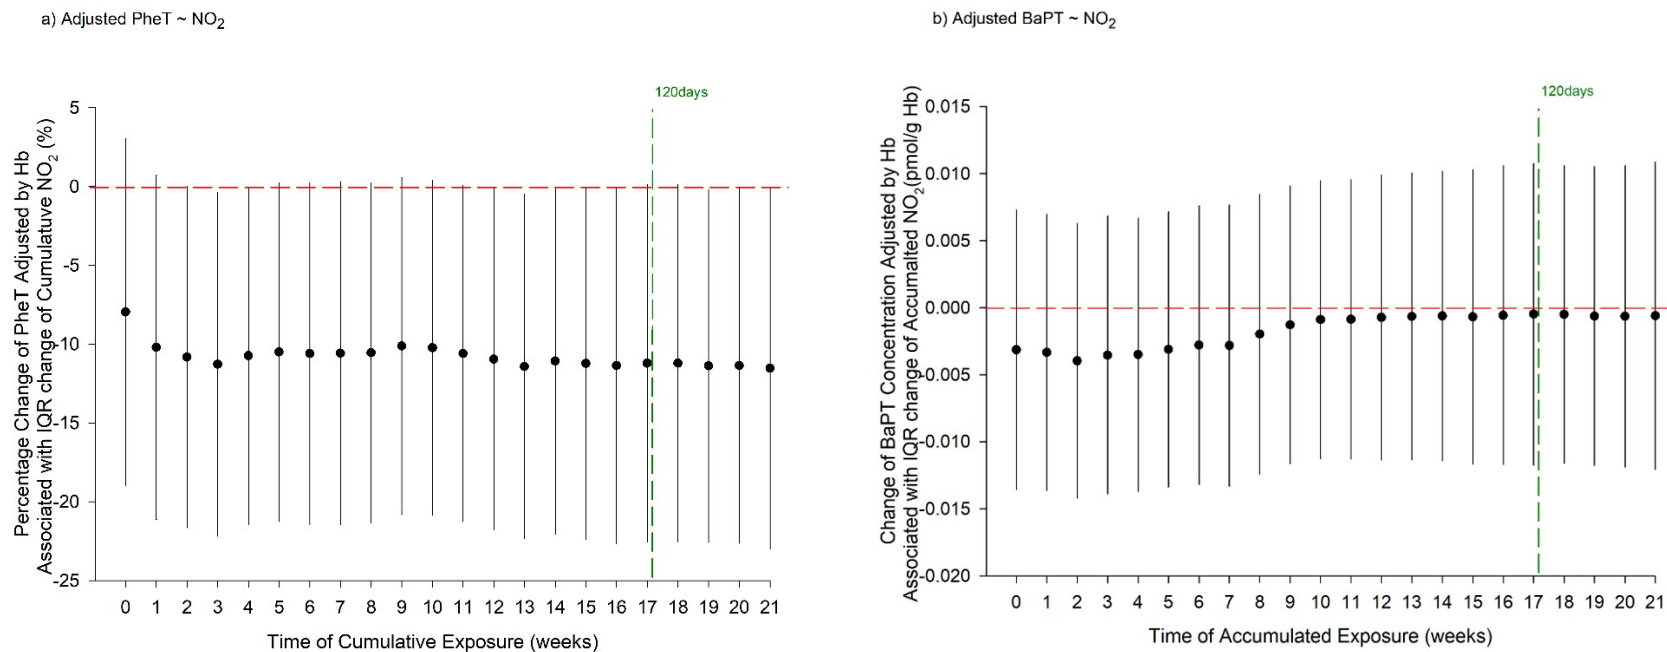

71

72 **Figure S3. The Change of PAH-Tetrols Concentration with an IQR Change of Weekly Cumulative NO<sub>2</sub> Exposure:** (a)  
 73 Phenanthrene-Tetrols (PHET) Adjusted by Hemoglobin Levels; (b) Benzo(a)Pyrene-Tetrols (BaPT) Adjusted by Hemoglobin Levels.  
 74 Generated using mixed-effects models with random intercepts of study participants and controlling for age, gestation age, pre-  
 75 pregnancy body mass index (BMI), income groups, education groups.

76

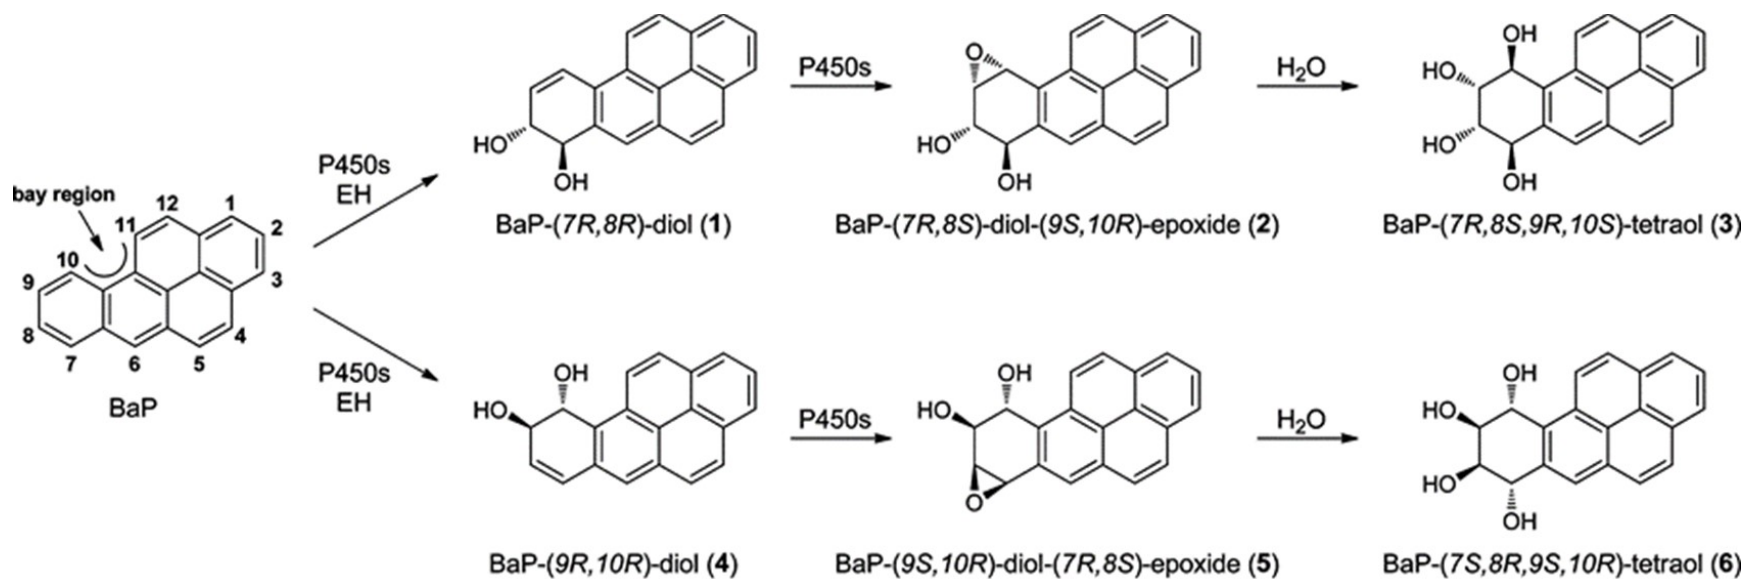

77

78 **Figure S4. Metabolic Activation of Benzo(a)pyrene: Formation of Diols, Di-Epoxides, and Tetraols.**

79



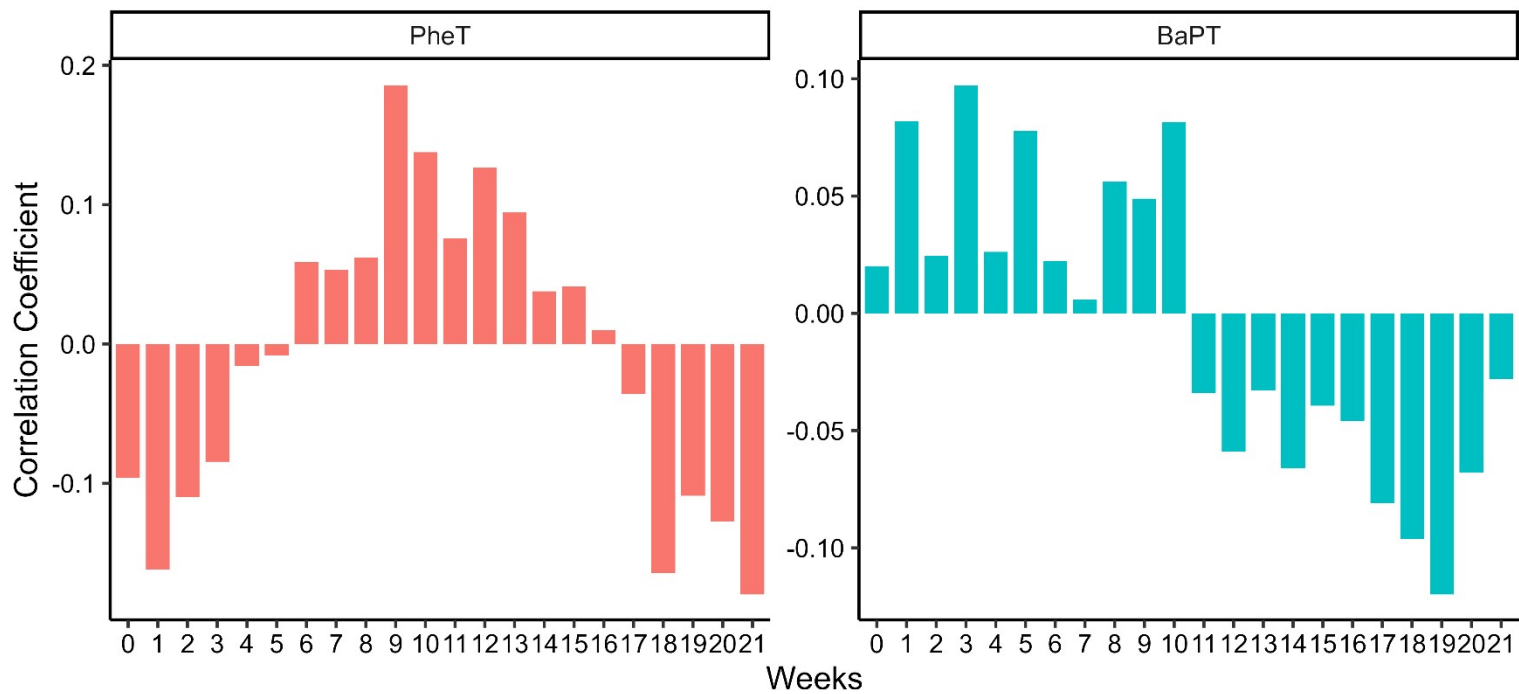

80

81 **Figure S5. Pearson correlation coefficient between PAH tetrols with weekly cumulative PM2.5 concentration. PheT-**  
 82 **Phenanthrene-Tetrols; BaPT- Benzo(a)Pyrene-Tetrols**

**Table S1-1. HPLC mobile phase gradient program**

| <b>Time(min)</b> | <b>A%</b> | <b>B%</b> | <b>flow rate (µl/min)</b> |
|------------------|-----------|-----------|---------------------------|
| 0                | 90        | 10        | 400                       |
| 2                | 90        | 10        | 400                       |
| 4                | 40        | 60        | 400                       |
| 6                | 40        | 60        | 400                       |
| 12               | 20        | 80        | 400                       |
| 14               | 0         | 100       | 400                       |
| 16               | 0         | 100       | 400                       |
| 18               | 40        | 60        | 400                       |
| 20               | 90        | 10        | 400                       |
| 22               | 90        | 10        | 400                       |

Mobile phase : A: 0.01% formic acid in water; B: 0.01% formic acid in methanol

**Table S1-2. Parameters used for the HPLC-MS/MS analysis**

|                       | <b>PHET</b> | <b>BaPT</b> |
|-----------------------|-------------|-------------|
| Ion Source Type       | APCI        | APCI        |
| Polarity              | Positive    | Positive    |
| Vaporizer Temperature | 300         | 400         |
| Sheath Gas Pressure   | 20          | 30          |
| Aux Gas Pressure      | 5           | 5           |
| Capillary Temperature | 200         | 200         |
| Capillary Offset      | 35          | 35          |

**Table S2. Estimated percentage change of PAH-tetrols concentration associated with each interquartile range (IQR) change in cumulative PM<sub>2.5</sub> weekly concentrations.**

**1) PheT ~ PM2.5**

| <b>Weeks</b> | <b>Percentage Change</b> | <b>95% CI Lower</b> | <b>95% CI Upper</b> | <b>p-value</b> | <b>IQR(<math>\mu\text{g}/\text{m}^3</math>)</b> |
|--------------|--------------------------|---------------------|---------------------|----------------|-------------------------------------------------|
| 0            | -2.36                    | -11.52              | 6.65                | 0.603          | 2.821                                           |
| 1            | -8.27                    | -19.20              | 2.66                | 0.139          | 2.543                                           |
| 2            | -9.75                    | -20.97              | 1.62                | 0.092          | 2.460                                           |
| 3            | -8.71                    | -20.24              | 2.95                | 0.145          | 2.398                                           |
| 4            | -3.84                    | -14.62              | 6.94                | 0.486          | 2.201                                           |
| 5            | -1.92                    | -11.96              | 8.27                | 0.718          | 2.120                                           |
| 6            | 0.74                     | -8.42               | 9.90                | 0.874          | 1.906                                           |
| 7            | 2.22                     | -6.65               | 10.93               | 0.626          | 1.848                                           |
| 8            | 3.25                     | -5.47               | 11.82               | 0.465          | 1.773                                           |
| 9            | 5.76                     | -2.81               | 14.33               | 0.186          | 1.717                                           |
| 10           | 7.53                     | -1.03               | 16.10               | 0.084          | 1.644                                           |
| 11           | 8.27                     | -0.30               | 16.84               | 0.058          | 1.555                                           |
| 12           | 8.71                     | 0.30                | 17.13               | <b>0.042</b>   | 1.448                                           |
| 13           | 9.01                     | 0.74                | 17.28               | <b>0.033</b>   | 1.306                                           |
| 14           | 9.01                     | 0.30                | 17.73               | <b>0.042</b>   | 1.261                                           |
| 15           | 9.60                     | 0.59                | 18.61               | <b>0.036</b>   | 1.188                                           |
| 16           | 10.19                    | 0.74                | 19.65               | <b>0.035</b>   | 1.118                                           |
| 17           | 9.90                     | 0.00                | 19.79               | <b>0.050</b>   | 1.049                                           |
| 18           | 7.09                     | -3.25               | 17.28               | 0.180          | 0.972                                           |
| 19           | 5.02                     | -5.17               | 15.21               | 0.338          | 0.868                                           |
| 20           | 2.95                     | -7.98               | 13.88               | 0.591          | 0.855                                           |

**2) BaPT ~ PM2.5**

| <b>Weeks</b> | <b>Percentage Change</b> | <b>95% CI Lower</b> | <b>95% CI Upper</b> | <b>p-value</b> | <b>IQR(<math>\mu\text{g}/\text{m}^3</math>)</b> |
|--------------|--------------------------|---------------------|---------------------|----------------|-------------------------------------------------|
| 0            | 3.48                     | -7.52               | 14.48               | 0.536          | 2.77                                            |
| 1            | 9.40                     | -3.81               | 22.61               | 0.164          | 2.52                                            |
| 2            | 9.23                     | -4.48               | 22.94               | 0.188          | 2.44                                            |
| 3            | 15.26                    | 1.11                | 29.41               | <b>0.035</b>   | 2.37                                            |
| 4            | 13.14                    | 0.07                | 26.21               | <b>0.049</b>   | 2.16                                            |
| 5            | 14.59                    | 1.94                | 27.23               | <b>0.024</b>   | 2.14                                            |
| 6            | 12.97                    | 1.50                | 24.45               | <b>0.027</b>   | 1.93                                            |
| 7            | 11.48                    | 0.41                | 22.54               | <b>0.043</b>   | 1.86                                            |
| 8            | 12.52                    | 1.66                | 23.38               | <b>0.024</b>   | 1.79                                            |
| 9            | 13.67                    | 2.94                | 24.40               | <b>0.013</b>   | 1.71                                            |
| 10           | 15.06                    | 4.47                | 25.65               | <b>0.006</b>   | 1.63                                            |

|    |       |       |       |              |      |
|----|-------|-------|-------|--------------|------|
| 11 | 14.66 | 3.90  | 25.43 | <b>0.008</b> | 1.56 |
| 12 | 13.12 | 2.66  | 23.58 | <b>0.014</b> | 1.44 |
| 13 | 12.91 | 2.56  | 23.25 | <b>0.015</b> | 1.31 |
| 14 | 12.69 | 1.85  | 23.53 | <b>0.022</b> | 1.27 |
| 15 | 12.39 | 1.14  | 23.63 | <b>0.031</b> | 1.20 |
| 16 | 12.36 | 0.88  | 23.84 | <b>0.035</b> | 1.11 |
| 17 | 11.53 | -0.47 | 23.53 | 0.060        | 1.05 |
| 18 | 9.90  | -2.36 | 22.15 | 0.114        | 0.97 |
| 19 | 6.59  | -5.38 | 18.55 | 0.281        | 0.86 |
| 20 | 5.17  | -7.52 | 17.87 | 0.425        | 0.85 |

---

**Table S3. Percentage changes of PAH-tetrols concentrations with one interquartile range (IQR) increase in proximity to a source traffic variable, with 95% confidence intervals and p-values.**

| Variable                    | Unit              | Change (%) | CI Lower | CI Upper | P Value |
|-----------------------------|-------------------|------------|----------|----------|---------|
| <b>a. PHET</b>              |                   |            |          |          |         |
| Distance to Airport         | Km                | 1.13       | -5.54    | 7.80     | 0.74    |
| Distance to Railway Yard    | Km                | 3.45       | -0.82    | 7.73     | 0.11    |
| AADT_300_RD                 | vehicles per year | 1.07       | -1.48    | 3.61     | 0.41    |
| TruckAADT_300_RD            | vehicles per year | 1.10       | -0.86    | 3.07     | 0.27    |
| FastFoodWithin1000mBuffer   | count             | 0.00       | 0.00     | 0.00     | 0.39    |
| CrossingWithin1000mBuffer   | count             | 0.41       | -2.57    | 3.39     | 0.79    |
| GasStationWithin1000mBuffer | count             | 0.00       | 0.00     | 0.00     | 0.27    |
| RailwayWithin1000mBuffer    | count             | -0.89      | -2.48    | 0.70     | 0.28    |
| <b>b. BaPT</b>              |                   |            |          |          |         |
| Distance to Airport         | Km                | -0.91      | -1.88    | 0.07     | 0.07    |
| Distance to Railway Yard    | Km                | -0.14      | -0.77    | 0.48     | 0.65    |
| AADT_300_RD                 | vehicles per year | 0.24       | -0.13    | 0.61     | 0.20    |
| TruckAADT_300_RD            | vehicles per year | 0.17       | -0.12    | 0.46     | 0.24    |
| FastFoodWithin1000mBuffer   | count             | 0.00       | 0.00     | 0.00     | 0.24    |
| CrossingWithin1000mBuffer   | count             | 0.24       | -0.19    | 0.67     | 0.28    |
| GasStationWithin1000mBuffer | count             | 0.00       | 0.00     | 0.00     | 0.42    |
| RailwayWithin1000mBuffer    | count             | -0.22      | -0.45    | 0.00     | 0.06    |

All models were adjusted for maternal age, gestation age, pre-pregnancy body mass index(BMI), income groups, education groups, sample collected season.

Abbreviations: AADT: annual average daily traffic.
